# Supplementary material for: Red Meat Consumption and Cancer Risk: A Systematic Analysis of Global Data
Source: MDPI journal article supplement (doi:10.3390/foods12224164), 2023-11-17
Supplement: s1 [file s1]

## Supplementary Material

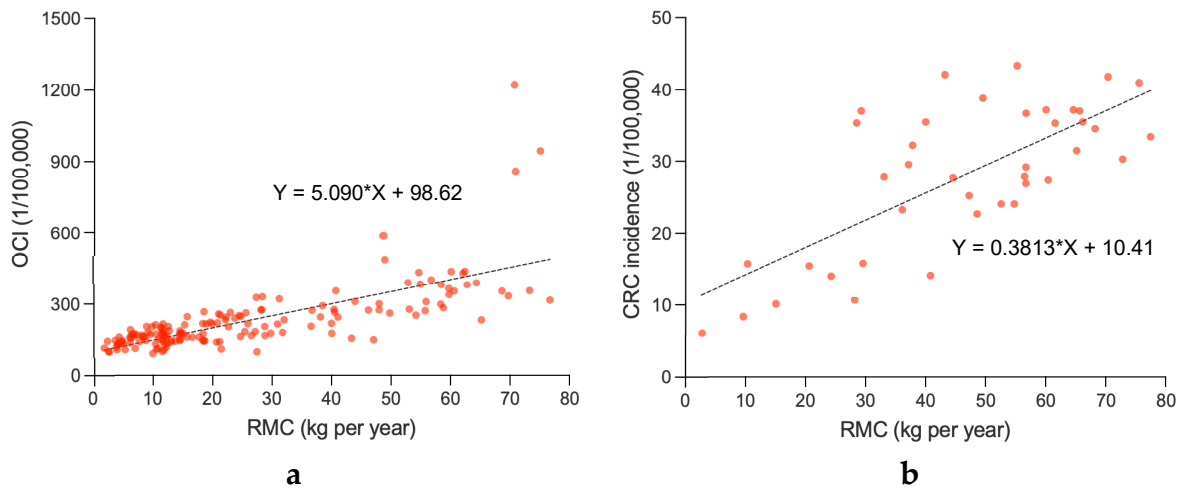

**Figure S1. Associations between RMC and OCI or CRC incidence; a,** Association between RMC and OCI (averages from 1992-2017, n=159). When RMC is very low, the OCI is about 98.62/100,000, and each 10 kg/year increase in RMC may result in an increase in OCI of 50.90/100,000. **b,** Association between RMC and CRC incidence (averages from 1999-2010, n=40). When RMC is very low, the CRC incidence is about 10.41/100,000, and each 10 kg/year increase in RMC may result in an increase in CRC incidence of 3.813/100,000. However, since the data are averaged over many years, the dose-response results may be less applicable to the present.

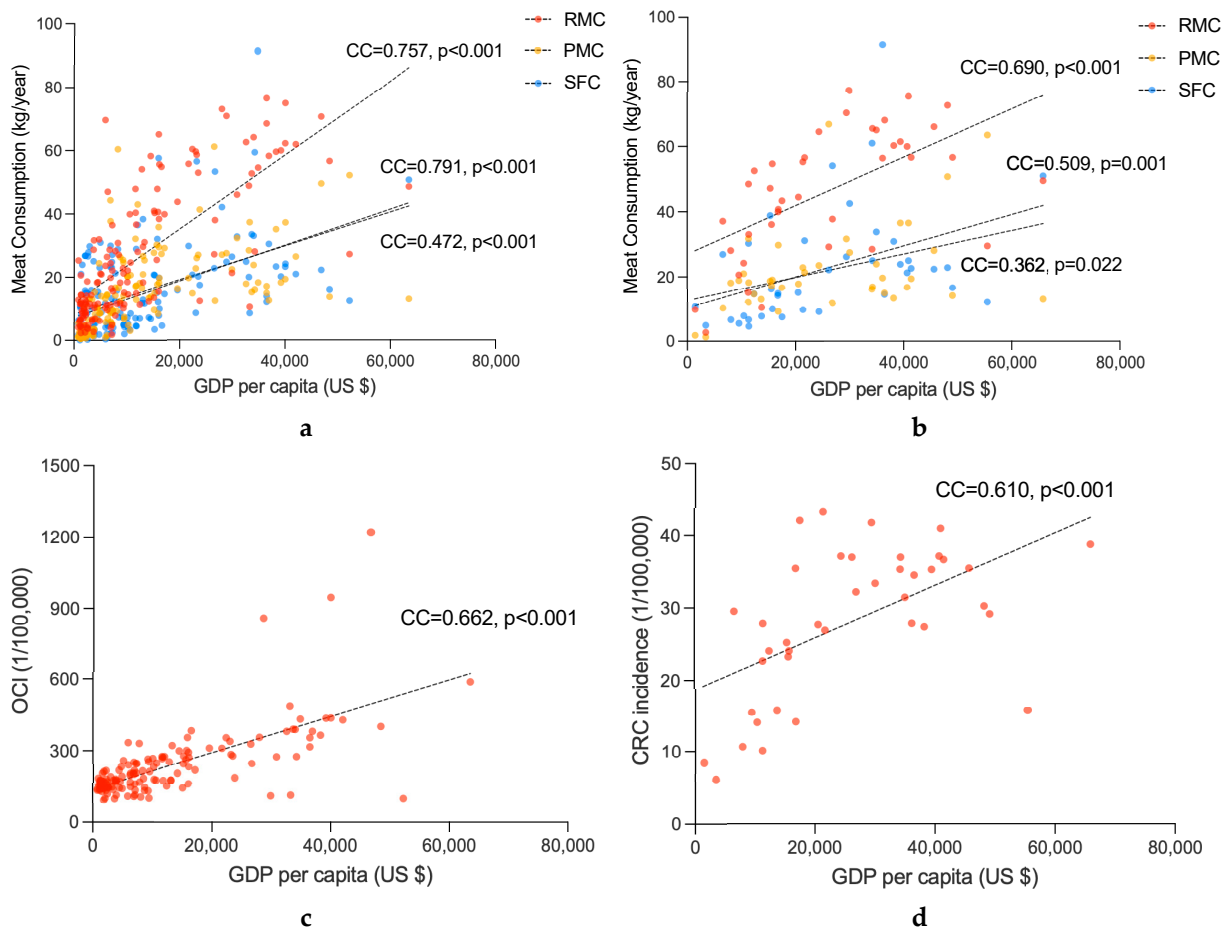

**Figure S2. Association between GDP and meat consumptions or cancer incidences; a,** Association between GDP per capita and RMC, PMC or SFC (averages from 1992-2017, n=144). **b,** Association between GDP per capita and RMC, PMC or SFC (averages from 1999-2010, n=40). **c,** Association between GDP per capita and OCI

(averages from 1992-2017, n=144). **d**, Association between GDP per capita and CRC incidence (averages from 1999-2010, n=40). The GDP per capita are positively and significantly associated with all the items.

Supplementary data for Figure 4 in the main text are listed in the following Figure S3 and Figure S4, where the countries and regions were divided into two groups based on whether their maximum annual per capita RMC exceeds 60 kg per year.

As can be seen from Figure S3 and Figure S4, about half of the countries and regions show similar trends in RMC and CRC incidence, and lag times between RMC and CRC incidence changes can be found in some cases. Moreover, higher CRC incidences generally exist in the countries and regions with higher RMC. However, there are also some countries not in line with this law. In these cases, maybe other factors exerted stronger impacts on the changes in CRC incidence.

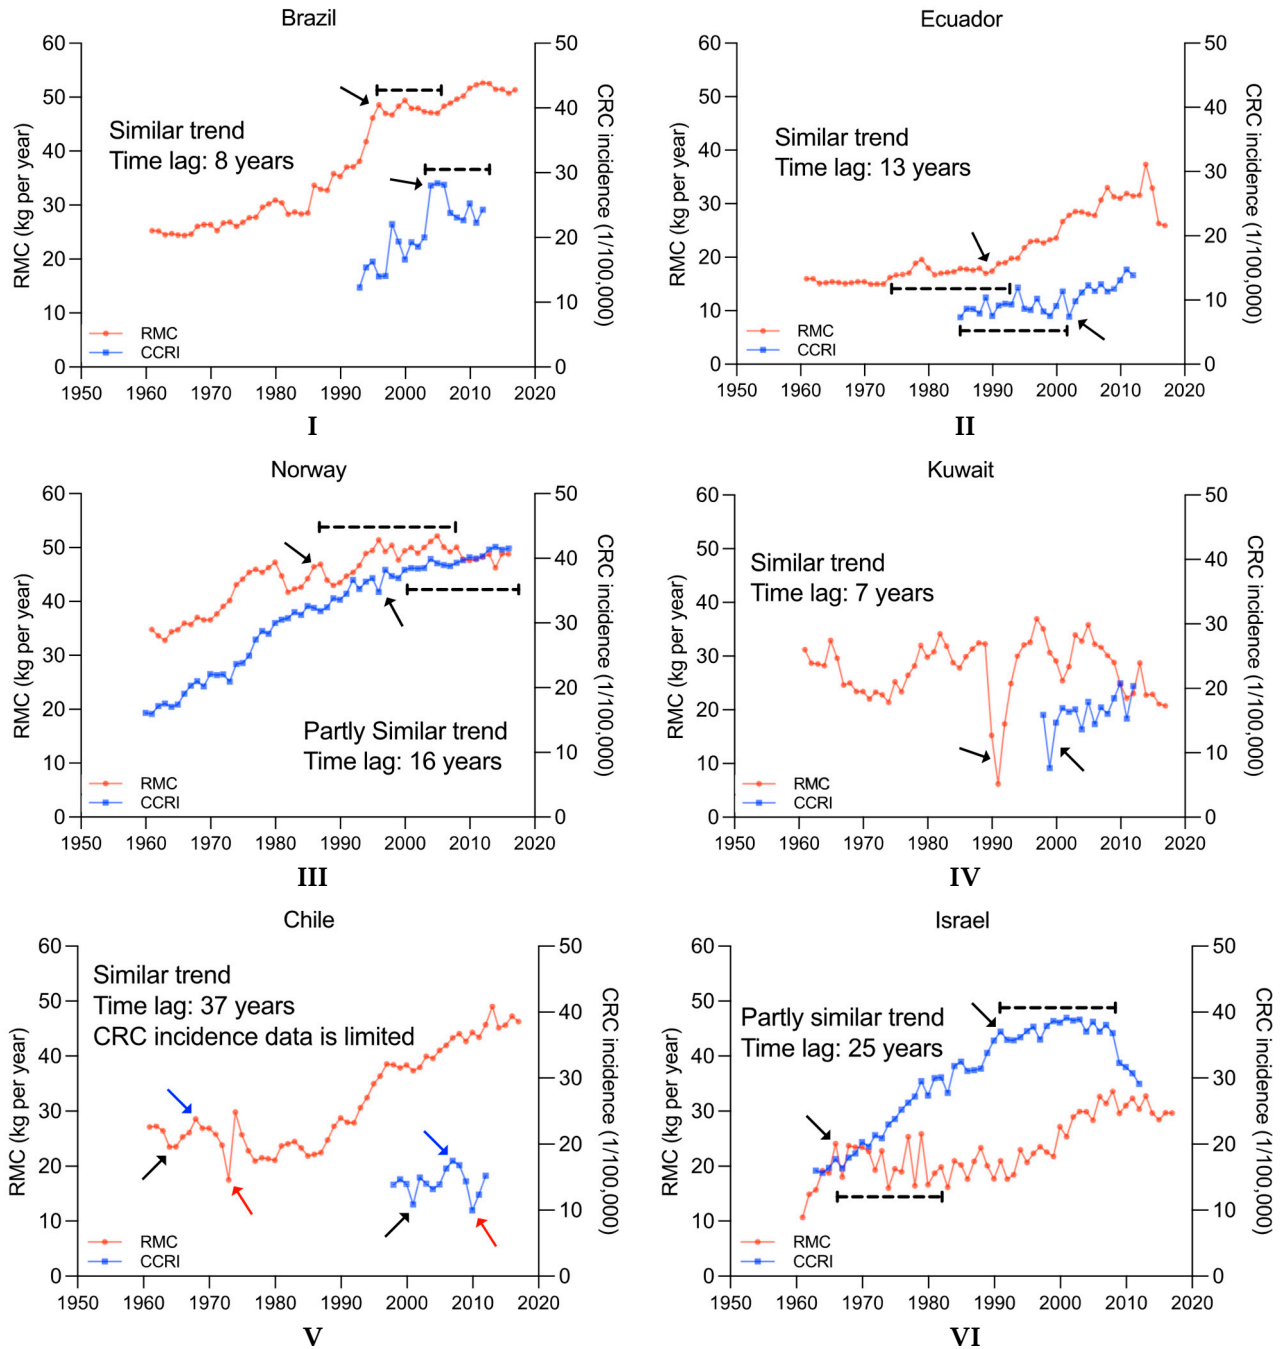

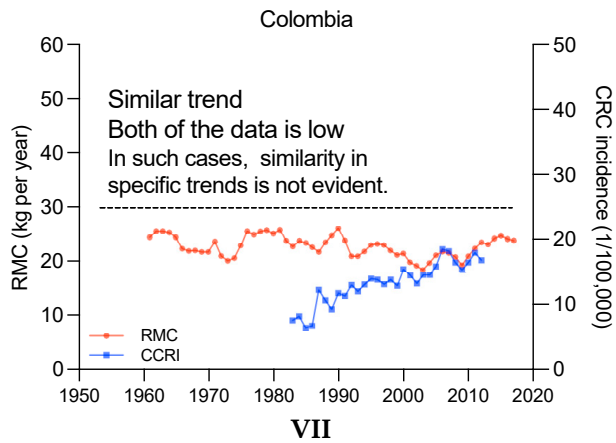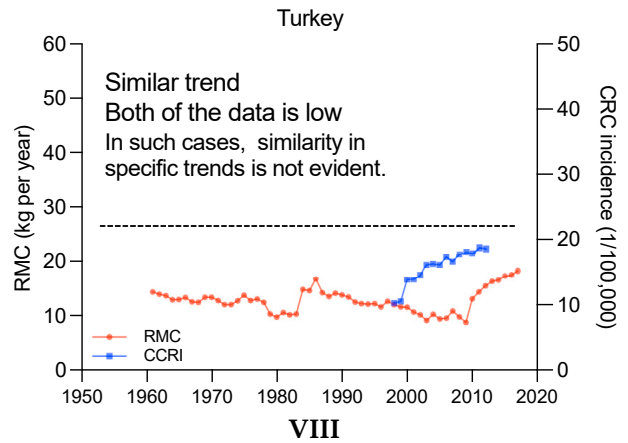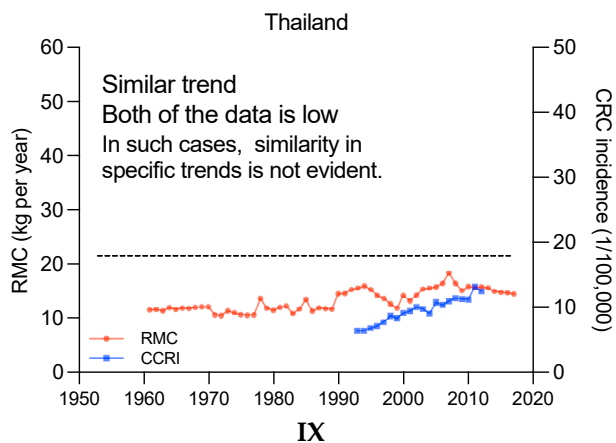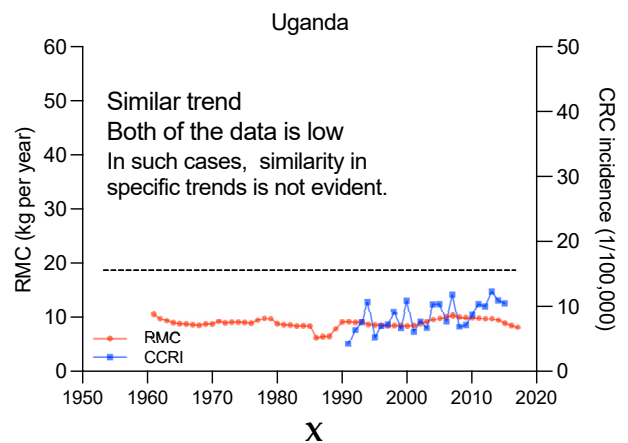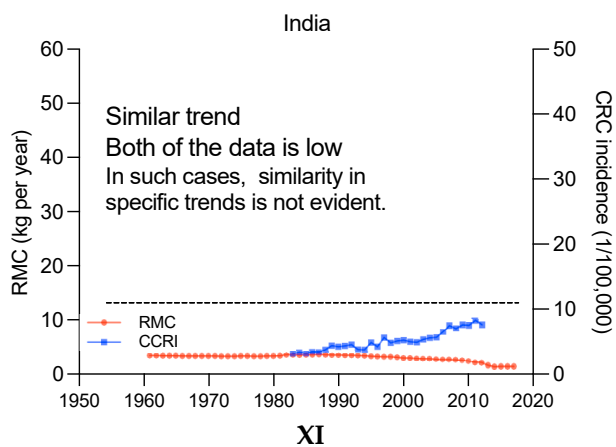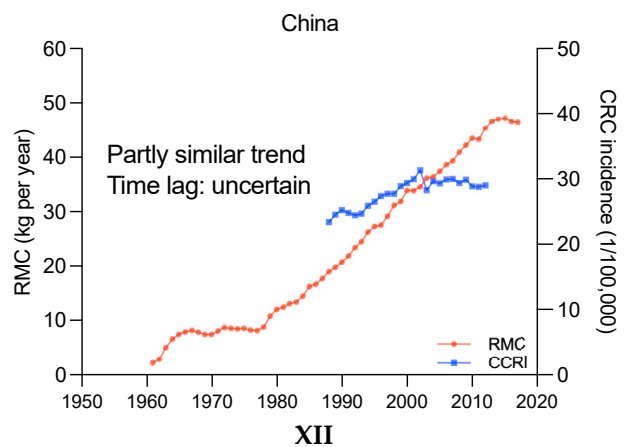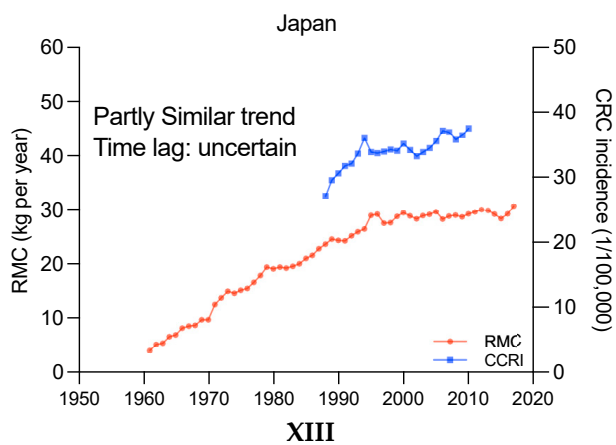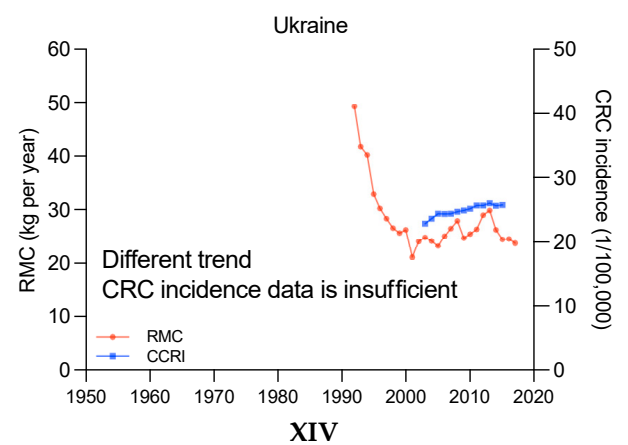

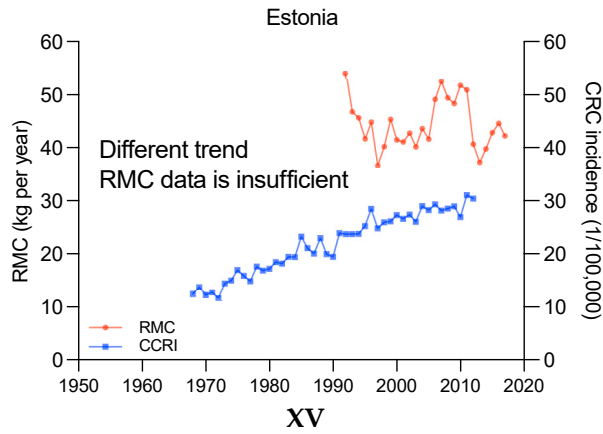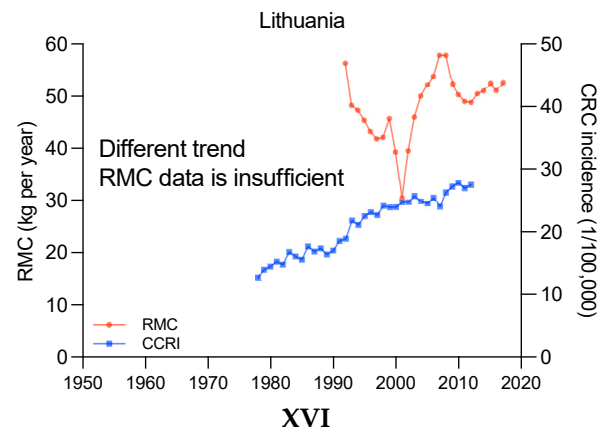

**Figure S3.** Time Association between RMC changes and CRC incidence Changes in countries and regions with maximum annual per capita RMC lower than 60 kg per year.

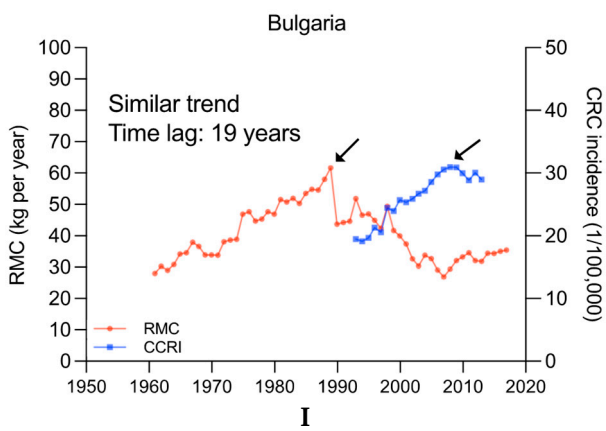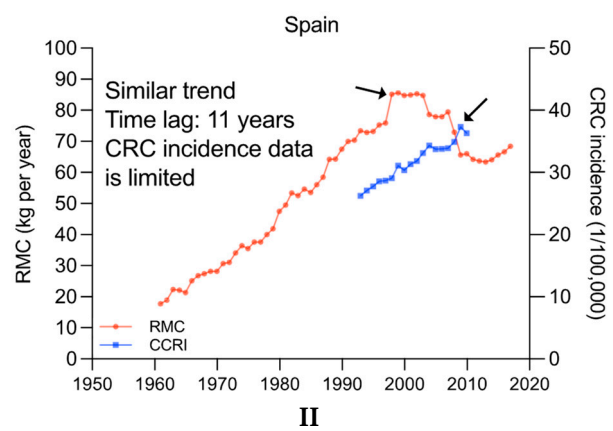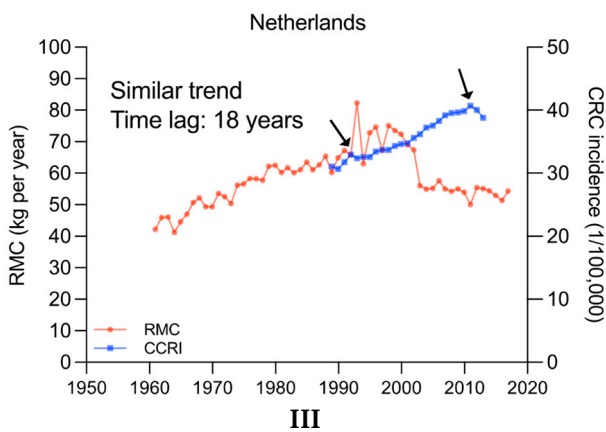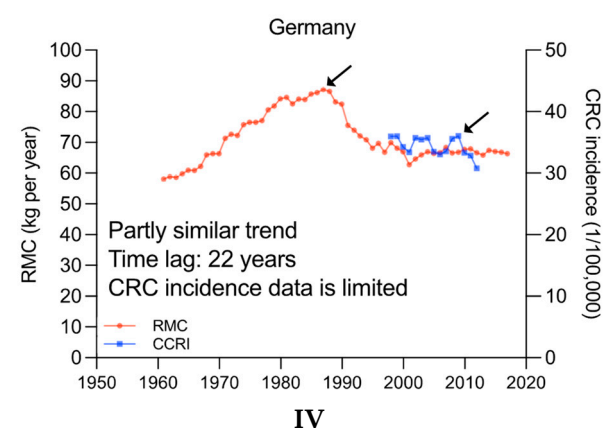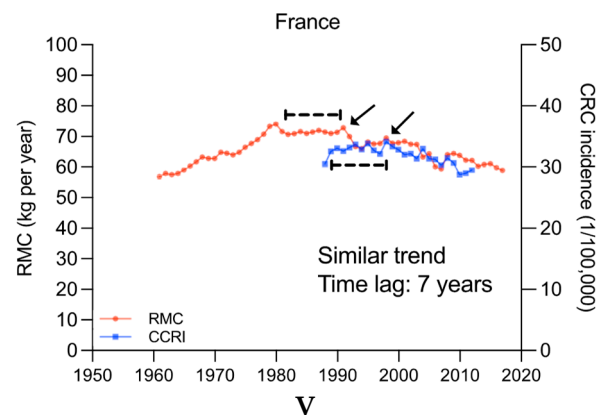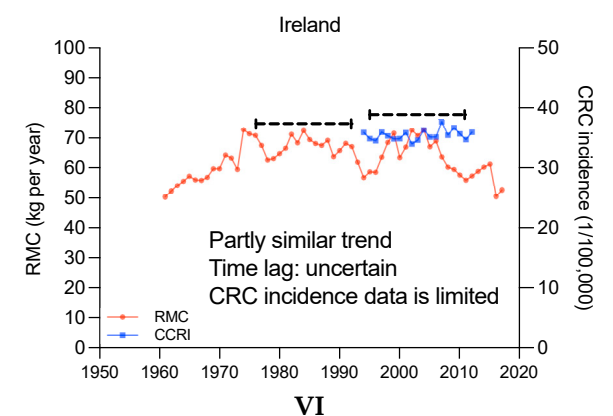

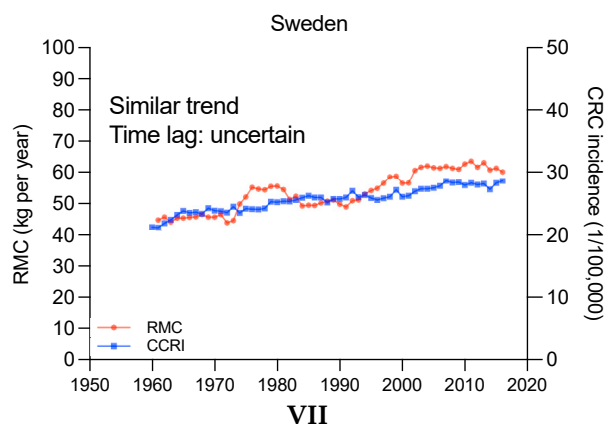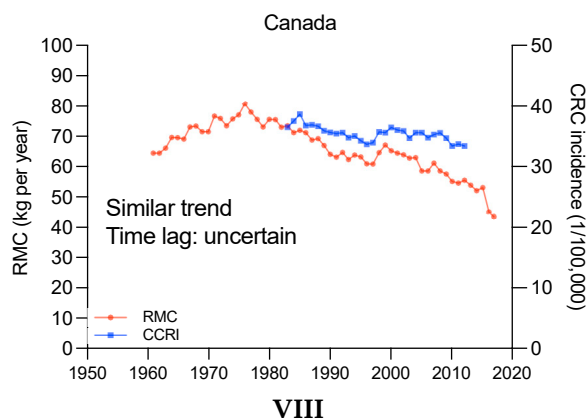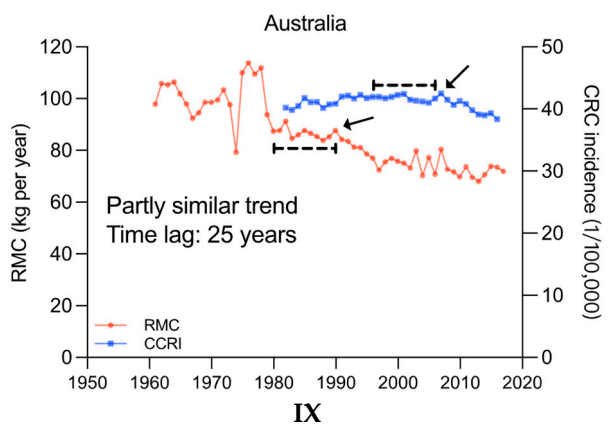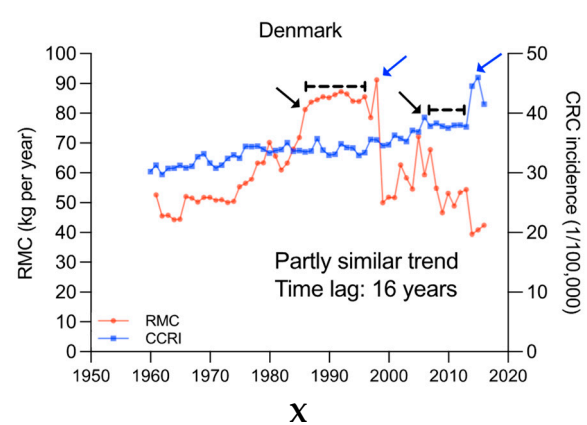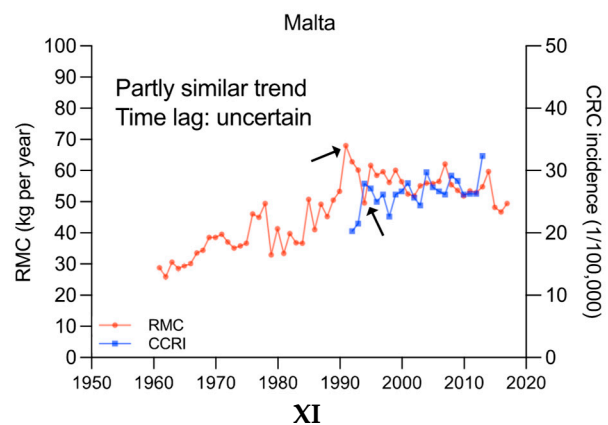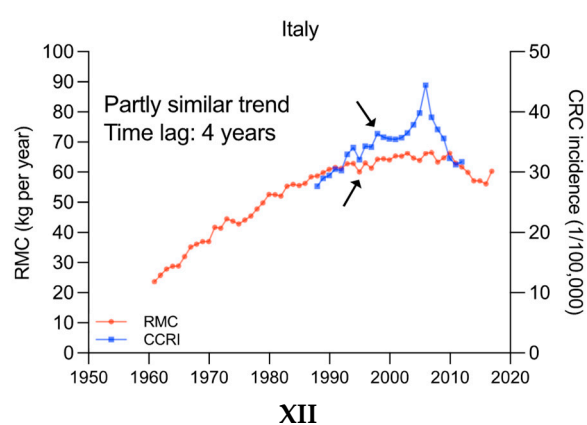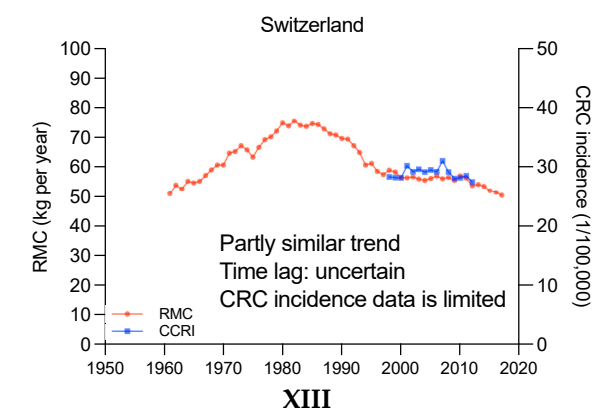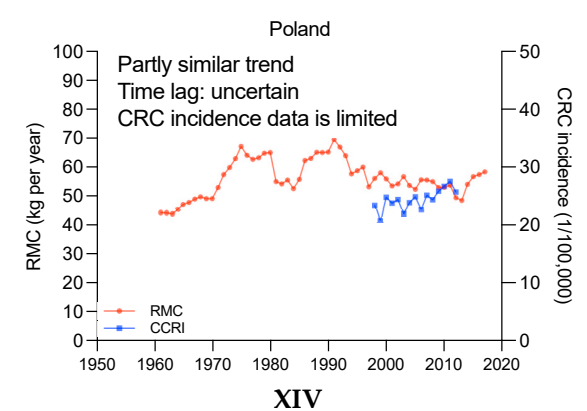

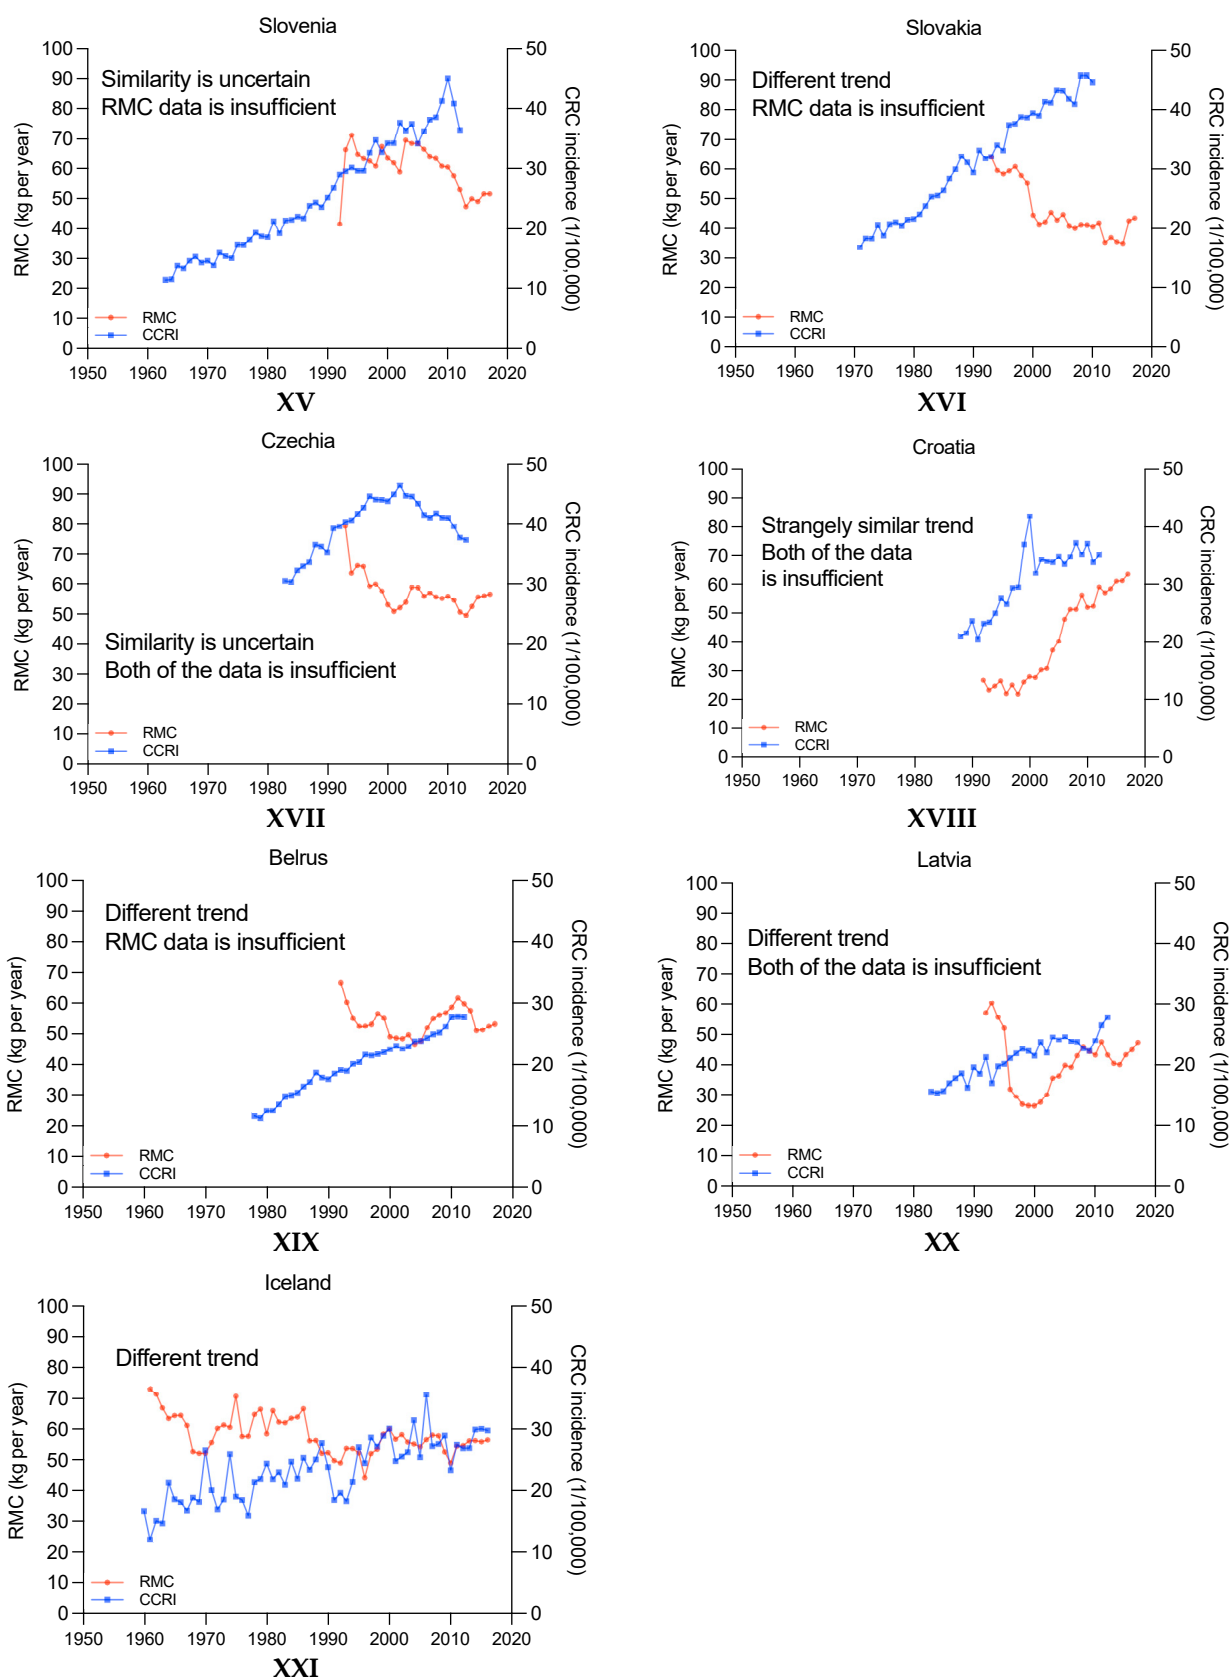

**Figure S4.** Time Association between RMC changes and CRC incidence changes in countries and regions with maximum annual per capita RMC higher than 60 kg per year.



**Table S1.** Correlation coefficients between RMC and OCI.

| Type           | Correlation Coefficient | P-value |
|----------------|-------------------------|---------|
| Group 1 (n=31) | 0.788                   | 0.000   |
| Group 2 (n=32) | 0.580                   | 0.001   |
| Group 3 (n=32) | 0.752                   | 0.000   |
| Group 4 (n=32) | 0.658                   | 0.000   |
| Group 5 (n=32) | 0.861                   | 0.000   |

Data from 159 countries and regions were categorized into five groups based on population size ordering. Correlation coefficients between RMC and OCI were calculated separately. The results based on these five groups of data are consistent with the calculation for the entire sample (0.798,  $p < 0.001$ , in Section 3.1.1).

**Table S2.** ANOVA of the cluster.

| Type                 | Cluster   |    | Error   |     | F       | P-value   |
|----------------------|-----------|----|---------|-----|---------|-----------|
|                      | MS        | df | MS      | df  |         |           |
| Bladder              | 1159.829  | 1  | 11.615  | 151 | 99.858  | $p=0.000$ |
| Brain,CNS            | 182.641   | 1  | 3.274   | 151 | 55.791  | $p=0.001$ |
| Breast               | 46110.98  | 1  | 171.646 | 151 | 268.64  | $p=0.002$ |
| Cervix uteri         | 2653.608  | 1  | 196     | 151 | 13.539  | $p=0.003$ |
| Corpus uteri         | 3200.626  | 1  | 20.372  | 151 | 157.108 | $p=0.004$ |
| Gallbladder          | 1.464     | 1  | 1.017   | 151 | 1.441   | $p=0.232$ |
| Hodgkin lymphoma     | 34.772    | 1  | 0.514   | 151 | 67.625  | $p=0.000$ |
| Hypopharynx          | 5.105     | 1  | 0.507   | 151 | 10.078  | $p=0.002$ |
| Kaposi sarcoma       | 14.262    | 1  | 7.533   | 151 | 1.893   | $p=0.171$ |
| Kidney               | 1068.244  | 1  | 6.402   | 151 | 166.854 | $p=0.000$ |
| Larynx               | 25.39     | 1  | 1.393   | 151 | 18.233  | $p=0.001$ |
| Leukaemia            | 304.324   | 1  | 3.746   | 151 | 81.246  | $p=0.002$ |
| Lip, oral cavity     | 61.889    | 1  | 3.121   | 151 | 19.832  | $p=0.003$ |
| Liver                | 472.725   | 1  | 63.375  | 151 | 7.459   | $p=0.007$ |
| Lung                 | 7965.271  | 1  | 75.724  | 151 | 105.188 | $p=0.000$ |
| Melanoma skin        | 2950.853  | 1  | 28.022  | 151 | 105.305 | $p=0.001$ |
| Mesothelioma         | 5.378     | 1  | 0.071   | 151 | 75.782  | $p=0.002$ |
| Multiple myeloma     | 143.636   | 1  | 0.727   | 151 | 197.52  | $p=0.003$ |
| Nasopharynx          | 9.304     | 1  | 1.523   | 151 | 6.109   | $p=0.015$ |
| Non-hodgkin lymphoma | 622.92    | 1  | 4.654   | 151 | 133.837 | $p=0.000$ |
| Non-melanoma of skin | 8319.001  | 1  | 254.946 | 151 | 32.63   | $p=0.001$ |
| Oesophagus           | 5.525     | 1  | 10.61   | 151 | 0.521   | $p=0.472$ |
| Oropharynx           | 45.998    | 1  | 0.64    | 151 | 71.888  | $p=0.000$ |
| Ovary                | 277.295   | 1  | 6.079   | 151 | 45.612  | $p=0.001$ |
| Pancreas             | 561.81    | 1  | 3.733   | 151 | 150.485 | $p=0.002$ |
| Penis                | 0.959     | 1  | 1.039   | 151 | 0.924   | $p=0.338$ |
| Prostate             | 65725.336 | 1  | 323.163 | 151 | 203.382 | $p=0.000$ |
| Salivary glands      | 0.01      | 1  | 0.091   | 151 | 0.115   | $p=0.735$ |
| Stomach              | 8.674     | 1  | 29.622  | 151 | 0.293   | $p=0.589$ |
| Testis               | 618.343   | 1  | 4.922   | 151 | 125.621 | $p=0.000$ |
| Thyroid              | 616.202   | 1  | 15.401  | 151 | 40.011  | $p=0.000$ |
| Vagina               | 0.008     | 1  | 0.067   | 151 | 0.123   | $p=0.727$ |
| Vulva                | 12.917    | 1  | 0.451   | 151 | 28.615  | $p=0.000$ |
| Colon                | 4274.019  | 1  | 20.065  | 151 | 213.007 | $p=0.001$ |
| Rectum               | 1081.154  | 1  | 9.814   | 151 | 110.167 | $p=0.002$ |
| Anus                 | 2.108     | 1  | 0.17    | 151 | 12.405  | $p=0.001$ |

**Table S3.** GDP per capita, OCI, RMC, PMC, SFC in 159 countries and regions.

| Country name                                         | ISO3 | RMC<br>(kg per year) | PMC<br>(kg per year) | SFC<br>(kg per year) | OCI<br>(1/100,000) | GDP per capita<br>(US \$) |
|------------------------------------------------------|------|----------------------|----------------------|----------------------|--------------------|---------------------------|
| Norway                                               | NOR  | 48.68                | 13.30                | 50.83                | 587.52             | 63400.99                  |
| Kuwait                                               | KWT  | 27.39                | 52.25                | 12.69                | 100.45             | 52182.33                  |
| Switzerland                                          | CHE  | 56.72                | 13.98                | 16.26                | 402.52             | 48385.96                  |
| United States of America                             | USA  | 70.77                | 49.64                | 22.37                | 1221.51            | 46827.12                  |
| Ireland                                              | IRL  | 62.03                | 26.58                | 21.06                | 430.41             | 41997.98                  |
| Australia                                            | AUS  | 75.07                | 37.40                | 24.31                | 945.43             | 40018.90                  |
| Denmark                                              | DNK  | 62.35                | 19.42                | 23.40                | 438.24             | 39982.15                  |
| Netherlands                                          | NLD  | 60.06                | 18.38                | 20.28                | 437.71             | 39166.50                  |
| Canada                                               | CAN  | 59.64                | 35.24                | 23.43                | 365.55             | 38243.56                  |
| Sweden                                               | SWE  | 58.34                | 12.83                | 30.59                | 382.05             | 36893.81                  |
| Germany                                              | DEU  | 68.56                | 15.13                | 14.16                | 354.93             | 36474.24                  |
| Austria                                              | AUT  | 76.62                | 17.21                | 12.34                | 316.46             | 36453.57                  |
| Iceland                                              | ISL  | 54.64                | 18.35                | 91.45                | 433.72             | 34852.42                  |
| Japan                                                | JPN  | 28.22                | 16.14                | 59.50                | 275.94             | 34202.50                  |
| France                                               | FRA  | 64.26                | 23.94                | 33.15                | 390.28             | 34012.14                  |
| Finland                                              | FIN  | 52.82                | 15.48                | 33.59                | 390.65             | 33659.75                  |
| Saudi Arabia                                         | SAU  | 10.78                | 37.43                | 8.85                 | 114.91             | 33268.51                  |
| United Kingdom of Great Britain and Northern Ireland | GBR  | 48.93                | 28.57                | 20.11                | 486.56             | 33105.29                  |
| Italy                                                | ITA  | 62.69                | 17.93                | 24.96                | 381.81             | 32559.55                  |
| Taiwan                                               | TWN  | 46.16                | 32.41                | 32.90                | 274.60             | 30874.74                  |
| Oman                                                 | OMN  | 21.39                | 22.54                | 26.51                | 111.72             | 29910.23                  |
| New Zealand                                          | NZL  | 70.95                | 27.66                | 24.95                | 860.11             | 28864.18                  |
| Spain                                                | ESP  | 73.19                | 27.21                | 42.18                | 356.70             | 28013.10                  |
| Republic of Korea                                    | KOR  | 38.08                | 12.73                | 53.40                | 246.45             | 26676.98                  |
| Israel                                               | ISR  | 27.28                | 61.26                | 22.91                | 328.08             | 26526.05                  |
| Trinidad and Tobago                                  | TTO  | 12.67                | 41.44                | 17.53                | 186.85             | 23788.78                  |
| Cyprus                                               | CYP  | 53.01                | 27.14                | 20.28                | 278.39             | 23506.69                  |
| Portugal                                             | PRT  | 58.70                | 26.10                | 56.60                | 284.55             | 23212.44                  |
| Slovenia                                             | SVN  | 59.68                | 22.85                | 8.88                 | 339.62             | 23027.30                  |
| Greece                                               | GRC  | 60.51                | 15.08                | 20.84                | 354.73             | 22413.25                  |
| Malta                                                | MLT  | 55.82                | 19.82                | 29.94                | 310.46             | 21695.92                  |
| Estonia                                              | EST  | 43.84                | 16.49                | 16.05                | 311.77             | 19582.98                  |
| Chile                                                | CHL  | 39.93                | 29.27                | 14.85                | 219.33             | 17118.24                  |
| Hungary                                              | HUN  | 54.90                | 27.40                | 4.62                 | 384.34             | 16540.48                  |
| Poland                                               | POL  | 55.68                | 19.79                | 10.16                | 271.96             | 16150.36                  |
| Russian Federation                                   | RUS  | 38.43                | 18.34                | 19.86                | 293.52             | 16089.98                  |
| Argentina                                            | ARG  | 65.11                | 29.58                | 7.99                 | 234.01             | 16031.95                  |
| Malaysia                                             | MYS  | 15.61                | 35.86                | 57.64                | 162.02             | 16025.05                  |
| Croatia                                              | HRV  | 40.65                | 8.64                 | 12.29                | 355.76             | 15910.46                  |
| Lithuania                                            | LTU  | 47.94                | 17.70                | 32.11                | 301.21             | 15752.00                  |
| Venezuela                                            | VEN  | 25.54                | 30.29                | 15.22                | 263.11             | 15655.24                  |
| Latvia                                               | LVA  | 40.37                | 15.15                | 20.73                | 277.06             | 15264.69                  |
| Kazakhstan                                           | KAZ  | 41.00                | 9.88                 | 3.44                 | 245.52             | 15171.70                  |
| Mauritius                                            | MUS  | 13.69                | 27.77                | 20.79                | 145.31             | 15116.47                  |
| Uruguay                                              | URY  | 58.29                | 13.99                | 6.95                 | 299.67             | 14529.08                  |
| Turkey                                               | TUR  | 12.51                | 13.54                | 7.39                 | 205.82             | 14147.34                  |
| Mexico                                               | MEX  | 31.13                | 25.39                | 11.83                | 322.31             | 13334.61                  |
| Panama                                               | PAN  | 29.71                | 26.69                | 13.01                | 176.96             | 13046.97                  |
| Gabon                                                | GAB  | 18.35                | 20.96                | 38.42                | 176.19             | 13039.46                  |
| Belarus                                              | BLR  | 54.10                | 16.70                | 11.87                | 253.56             | 12835.90                  |
| Iran                                                 | IRN  | 11.47                | 18.20                | 7.09                 | 153.00             | 12455.52                  |
| Barbados                                             | BRB  | 28.07                | 43.05                | 36.54                | 275.99             | 12049.83                  |
| Bulgaria                                             | BGR  | 36.64                | 17.37                | 4.45                 | 274.15             | 11765.71                  |
| Thailand                                             | THA  | 15.05                | 13.01                | 28.99                | 175.46             | 11763.27                  |
| Romania                                              | ROU  | 40.44                | 17.10                | 4.53                 | 266.68             | 11670.70                  |
| Brazil                                               | BRA  | 47.94                | 32.22                | 7.17                 | 275.31             | 11604.19                  |
| Costa Rica                                           | CRI  | 24.70                | 20.67                | 8.75                 | 248.28             | 10704.75                  |
| Turkmenistan                                         | TKM  | 39.96                | 3.03                 | 3.32                 | 177.44             | 10555.73                  |



|                        |     |       |       |       |        |          |
|------------------------|-----|-------|-------|-------|--------|----------|
| Botswana               | BWA | 14.66 | 4.74  | 3.64  | 179.79 | 10221.48 |
| Colombia               | COL | 22.11 | 20.23 | 5.53  | 233.31 | 10147.41 |
| Lebanon                | LBN | 18.50 | 20.27 | 7.36  | 267.71 | 10102.51 |
| Azerbaijan             | AZE | 15.27 | 6.84  | 2.02  | 213.38 | 9482.02  |
| Algeria                | DZA | 11.51 | 7.62  | 4.21  | 102.54 | 9462.39  |
| North Macedonia        | MKD | 21.21 | 14.25 | 4.98  | 253.42 | 9370.18  |
| Jordan                 | JOR | 10.38 | 24.71 | 4.86  | 132.81 | 9321.17  |
| South Africa           | ZAF | 22.93 | 25.54 | 7.25  | 265.25 | 9255.46  |
| Dominican Republic     | DOM | 18.29 | 26.41 | 8.79  | 149.19 | 8745.37  |
| Tunisia                | TUN | 11.87 | 12.52 | 11.37 | 133.44 | 8732.69  |
| Ecuador                | ECU | 27.11 | 16.77 | 7.44  | 184.57 | 8448.65  |
| Saint Lucia            | LCA | 30.87 | 60.43 | 28.94 | 215.86 | 8287.20  |
| Egypt                  | EGY | 11.77 | 9.45  | 15.93 | 106.80 | 8089.76  |
| Peru                   | PER | 8.04  | 16.72 | 21.29 | 169.54 | 7811.18  |
| Ukraine                | UKR | 28.34 | 14.31 | 12.58 | 331.43 | 7784.02  |
| Bosnia and Herzegovina | BIH | 15.70 | 9.49  | 3.94  | 247.09 | 7380.35  |
| Armenia                | ARM | 22.20 | 8.82  | 2.35  | 244.96 | 7241.49  |
| China                  | CHN | 36.50 | 9.84  | 27.17 | 206.52 | 7231.85  |
| Indonesia              | IDN | 4.92  | 5.44  | 24.87 | 135.40 | 7144.07  |
| Sri Lanka              | LKA | 1.78  | 4.77  | 23.16 | 115.32 | 7107.28  |
| Namibia                | NAM | 16.54 | 9.41  | 13.43 | 160.93 | 7037.60  |
| Iraq                   | IRQ | 3.90  | 6.00  | 2.20  | 109.61 | 6931.75  |
| Georgia                | GEO | 19.86 | 8.79  | 5.37  | 217.95 | 6920.67  |
| Dominica               | DMA | 24.45 | 37.71 | 29.99 | 251.32 | 6915.86  |
| Jamaica                | JAM | 11.28 | 44.34 | 23.27 | 202.74 | 6857.41  |
| Albania                | ALB | 28.72 | 9.38  | 4.60  | 205.69 | 6721.11  |
| Paraguay               | PRY | 47.01 | 7.06  | 4.55  | 150.30 | 6359.63  |
| El Salvador            | SLV | 9.80  | 14.66 | 5.32  | 205.14 | 6276.23  |
| Uzbekistan             | UZB | 26.46 | 1.54  | 0.83  | 168.66 | 6240.95  |
| Guatemala              | GTM | 11.33 | 14.40 | 1.98  | 197.48 | 6202.75  |
| Eswatini               | SWZ | 23.67 | 5.82  | 4.02  | 240.83 | 5951.78  |
| Mongolia               | MNG | 69.64 | 0.90  | 0.38  | 334.19 | 5940.64  |
| Morocco                | MAR | 10.50 | 13.36 | 11.84 | 110.00 | 5910.76  |
| Cuba                   | CUB | 20.96 | 14.17 | 9.04  | 258.95 | 5172.08  |
| Philippines            | PHL | 21.16 | 8.83  | 31.00 | 142.43 | 4963.45  |
| Congo                  | COG | 6.15  | 8.64  | 23.10 | 192.23 | 4853.65  |
| Bolivia                | BOL | 31.99 | 24.44 | 1.83  | 233.20 | 4722.29  |
| Cabo Verde             | CPV | 18.49 | 10.37 | 15.49 | 145.49 | 4530.33  |
| Angola                 | AGO | 11.71 | 6.51  | 14.24 | 170.89 | 4509.14  |
| Republic of Moldova    | MDA | 18.29 | 10.46 | 7.64  | 218.63 | 4349.96  |
| Yemen                  | YEM | 6.94  | 8.41  | 5.31  | 114.77 | 3996.93  |
| Honduras               | HND | 11.36 | 15.41 | 3.23  | 176.47 | 3859.95  |
| Pakistan               | PAK | 10.45 | 3.26  | 2.07  | 174.08 | 3816.71  |
| Kyrgyzstan             | KGZ | 31.71 | 3.57  | 1.36  | 180.76 | 3772.91  |
| Vietnam                | VNM | 28.74 | 6.75  | 25.10 | 168.60 | 3707.98  |
| India                  | IND | 2.64  | 1.40  | 5.07  | 99.61  | 3696.26  |
| Nigeria                | NGA | 6.14  | 1.49  | 10.47 | 137.70 | 3448.32  |
| Nicaragua              | NIC | 6.71  | 13.12 | 3.81  | 176.49 | 3415.51  |
| Laos                   | LAO | 14.44 | 3.20  | 15.92 | 149.79 | 3251.22  |
| Myanmar                | MMR | 11.69 | 13.29 | 29.78 | 191.14 | 2929.17  |
| Sao Tome and Principe  | STP | 4.73  | 6.63  | 27.92 | 145.90 | 2699.62  |
| Ghana                  | GHA | 3.57  | 3.94  | 26.63 | 147.84 | 2619.56  |
| Tajikistan             | TJK | 10.93 | 1.65  | 0.29  | 155.11 | 2569.40  |
| Cote d'Ivoire          | CIV | 3.80  | 1.70  | 15.10 | 120.31 | 2476.31  |
| Mauritania             | MRT | 18.66 | 3.27  | 8.87  | 146.75 | 2473.92  |
| Djibouti               | DJI | 14.34 | 2.35  | 2.78  | 170.57 | 2339.86  |
| Kenya                  | KEN | 12.28 | 0.71  | 4.18  | 134.86 | 2273.54  |
| Cameroon               | CMR | 8.27  | 2.87  | 15.14 | 163.42 | 2194.49  |
| Zambia                 | ZMB | 9.09  | 3.17  | 7.97  | 180.51 | 2179.31  |
| Lesotho                | LSO | 11.62 | 4.60  | 0.85  | 216.87 | 2165.42  |
| Cambodia               | KHM | 12.98 | 2.00  | 26.84 | 147.91 | 2126.28  |
| Bangladesh             | BGD | 2.48  | 1.21  | 15.83 | 101.52 | 2083.02  |

|                                  |     |       |       |        |        |         |
|----------------------------------|-----|-------|-------|--------|--------|---------|
| Senegal                          | SEN | 8.78  | 3.48  | 26.84  | 147.75 | 2074.98 |
| Benin                            | BEN | 4.83  | 10.69 | 11.87  | 142.06 | 1900.94 |
| Nepal                            | NPL | 9.89  | 0.86  | 1.72   | 93.78  | 1890.24 |
| Zimbabwe                         | ZWE | 10.39 | 3.86  | 2.45   | 212.85 | 1787.15 |
| North Korea                      | PRK | 7.19  | 1.62  | 11.15  | 172.09 | 1767.51 |
| United Republic of Tanzania      | TZA | 7.69  | 1.59  | 8.07   | 143.06 | 1625.49 |
| Gambia                           | GMB | 4.00  | 2.98  | 23.99  | 129.93 | 1548.21 |
| Haiti                            | HTI | 8.86  | 4.46  | 3.60   | 206.17 | 1542.32 |
| Uganda                           | UGA | 9.48  | 1.76  | 11.00  | 173.64 | 1466.95 |
| Mali                             | MLI | 14.51 | 2.72  | 8.37   | 149.07 | 1347.77 |
| Burkina Faso                     | BFA | 12.04 | 2.30  | 3.68   | 161.43 | 1320.04 |
| Sierra Leone                     | SLE | 2.30  | 2.54  | 21.03  | 144.03 | 1319.88 |
| Guinea-Bissau                    | GNB | 14.55 | 1.56  | 2.79   | 175.81 | 1296.81 |
| Madagascar                       | MDG | 11.66 | 3.61  | 6.41   | 143.55 | 1267.22 |
| Rwanda                           | RWA | 4.26  | 0.59  | 2.43   | 161.70 | 1263.70 |
| Chad                             | TCD | 20.61 | 0.52  | 6.63   | 140.29 | 1261.73 |
| Togo                             | TGO | 4.46  | 4.59  | 10.41  | 135.79 | 1196.39 |
| Guinea                           | GIN | 6.38  | 1.14  | 10.94  | 171.71 | 1166.57 |
| Mozambique                       | MOZ | 6.71  | 2.25  | 5.21   | 164.50 | 1160.48 |
| Afghanistan                      | AFG | 11.67 | 1.34  | 0.11   | 176.45 | 1132.99 |
| Malawi                           | MWI | 6.07  | 2.33  | 6.29   | 161.40 | 985.69  |
| Central African Republic         | CAF | 25.35 | 1.24  | 6.49   | 184.32 | 851.43  |
| Liberia                          | LBR | 4.10  | 5.50  | 5.21   | 135.00 | 799.50  |
| Niger                            | NER | 12.98 | 0.98  | 1.72   | 140.37 | 788.12  |
| United Arab Emirates             | ARE | 22.62 | 36.55 | 24.12  | 204.82 | N/A     |
| Antigua and Barbuda              | ATG | 19.58 | 55.70 | 49.23  | 223.99 | N/A     |
| Bahamas                          | BHS | 49.70 | 48.91 | 29.89  | 262.19 | N/A     |
| Belize                           | BLZ | 17.68 | 25.59 | 13.47  | 162.14 | N/A     |
| Fiji                             | FJI | 24.64 | 17.01 | 33.31  | 163.80 | N/A     |
| Grenada                          | GRD | 18.88 | 32.75 | 30.04  | 216.81 | N/A     |
| Guyana                           | GUY | 6.11  | 29.65 | 37.80  | 157.49 | N/A     |
| Kiribati                         | KIR | 14.48 | 14.36 | 74.01  | 188.38 | N/A     |
| Maldives                         | MDV | 5.28  | 8.76  | 148.69 | 109.40 | N/A     |
| Solomon Islands                  | SLB | 8.40  | 2.01  | 36.57  | 162.99 | N/A     |
| Suriname                         | SUR | 12.23 | 28.85 | 15.43  | 165.34 | N/A     |
| Timor-Leste                      | TLS | 12.23 | 5.20  | 3.59   | 120.18 | N/A     |
| Saint Vincent and the Grenadines | VCT | 20.76 | 58.85 | 16.87  | 220.68 | N/A     |
| Vanuatu                          | VUT | 25.90 | 8.19  | 32.02  | 217.23 | N/A     |
| Samoa                            | WSM | 43.28 | 38.16 | 48.90  | 157.07 | N/A     |
